# Supplementary material for: Threshold magnetoresistance in anistropic magnetic 2D transition metal dichalcogenides
Source: Royal Society of Chemistry journal article supplement (doi:10.1039/c7tc05769e), 2018-01-01
Supplement: c7tc05769e1.pdf [file c7tc05769e1.pdf]

## SUPPLEMENTARY MATERIALS

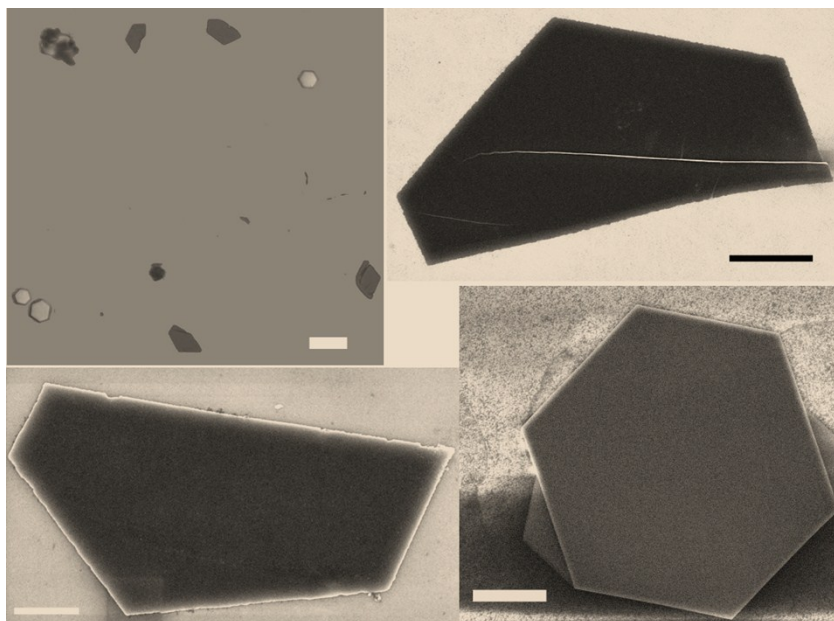

**Figure S1.** Typical optical (Top left) and SEM images of grown  $\text{VS}_2$  flakes. The scale bar is 1  $\mu\text{m}$ .

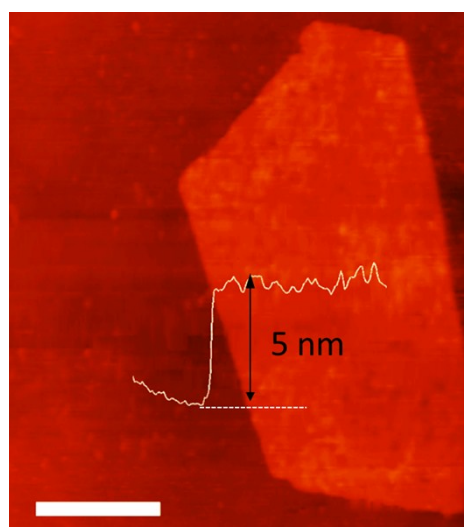

**Figure S2.** Atomic Force Microscopy of a typical  $\text{VS}_2$  flake with a thickness of 5 nm.

### Energy-dispersive X-ray spectroscopy (EDS) of $\text{VS}_2$

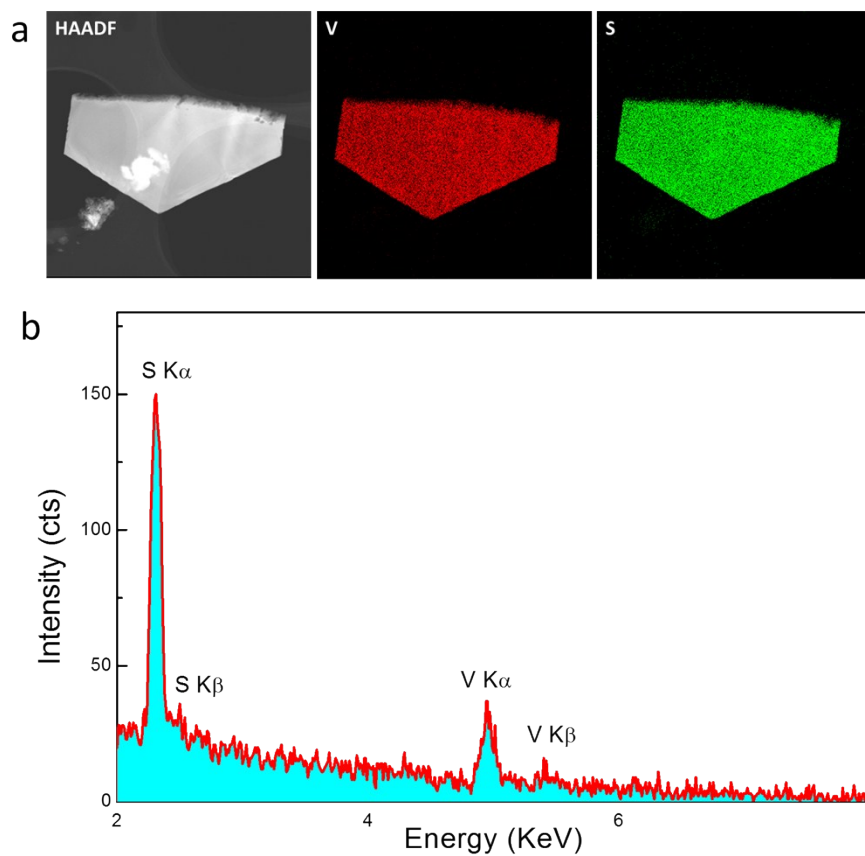

**Figure S3.** (a) EDS element mapping of VS<sub>2</sub>. (b) EDS of VS<sub>2</sub>.

### Raman characterization of VS<sub>2</sub>

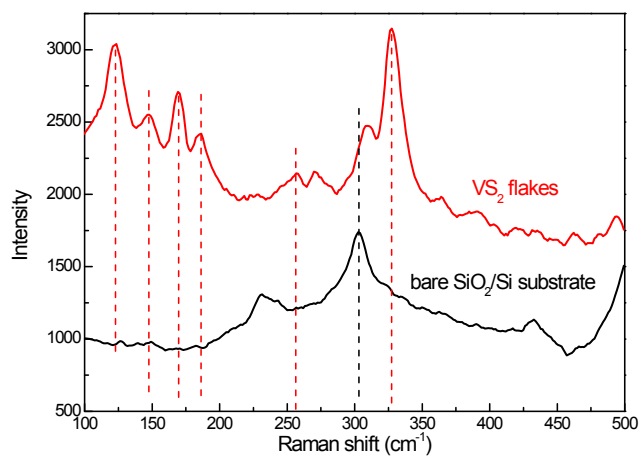

**Figure S4.** Raman spectra of VS<sub>2</sub> flakes and the bare substrate.

The positioning of the highest peak around  $330\text{ cm}^{-1}$  and the wide hump around  $260\text{ cm}^{-1}$  agree with the earlier publication, which are tentatively assigned to the out-of-plane ( $A_1$ ) and in-plane ( $E_2$ ) vibration modes of  $VS_2$ , respectively<sup>1,2</sup>. A series of peaks from  $120\text{ cm}^{-1}$  to  $190\text{ cm}^{-1}$  are clear in our sample and they were claimed in the Ref. S1 as two-phonon process signals. On the other hand, we note these peaks ( $120\text{-}190\text{ cm}^{-1}$ ) are close to the results of calculations of phonons in  $1T\text{-VS}_2$  (Ref.S3). It is worth mentioning that all these Raman peaks are quite different from those of  $V_5S_8$  nanosheets ( $E1a \sim 280\text{ cm}^{-1}$ ,  $A1a \sim 406\text{ cm}^{-1}$  in Ref.3) although it is also possible that the spectra are influenced by phases of V and S<sup>4</sup>.

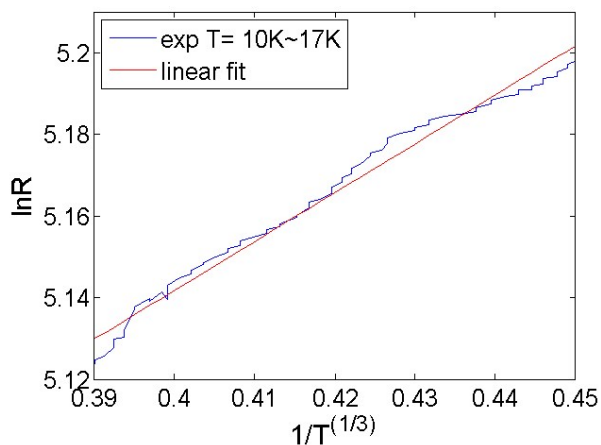

**Figure S5.** R-T curves. The resistance ( $R$ ) is fitted for the lowest temperature ( $T$ ) range  $10 \sim 20\text{K}$ .

In this range the R-T relation can be fitted by using axes of  $\ln R$  and  $\left(\frac{1}{T}\right)^{1/3}$  to show linear

dependence, demonstrating the good fit of the data to the empirical formula  $R(T) = A_0 \exp\left\{\left(\frac{T_0}{T}\right)^{\frac{1}{d+1}}\right\}$ .

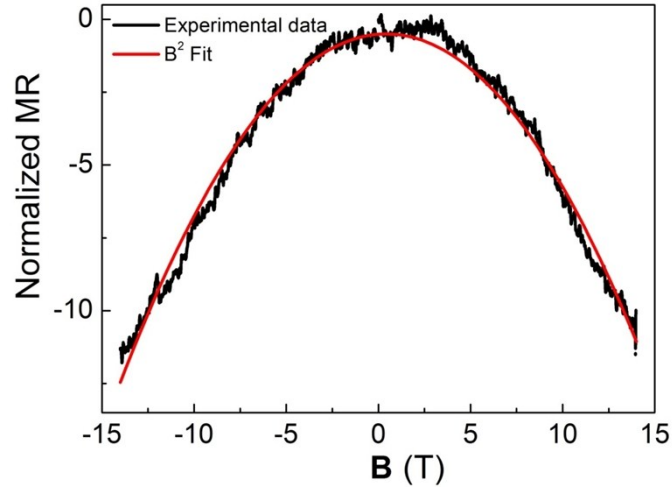

**Figure S6** The quadratic  $B$  fitting for the MR of  $VS_2$  measured at 2K under an in-plane magnetic up to 14T. The strong correlation shows that the MR can be fitted by quadratic  $B$  quite well.

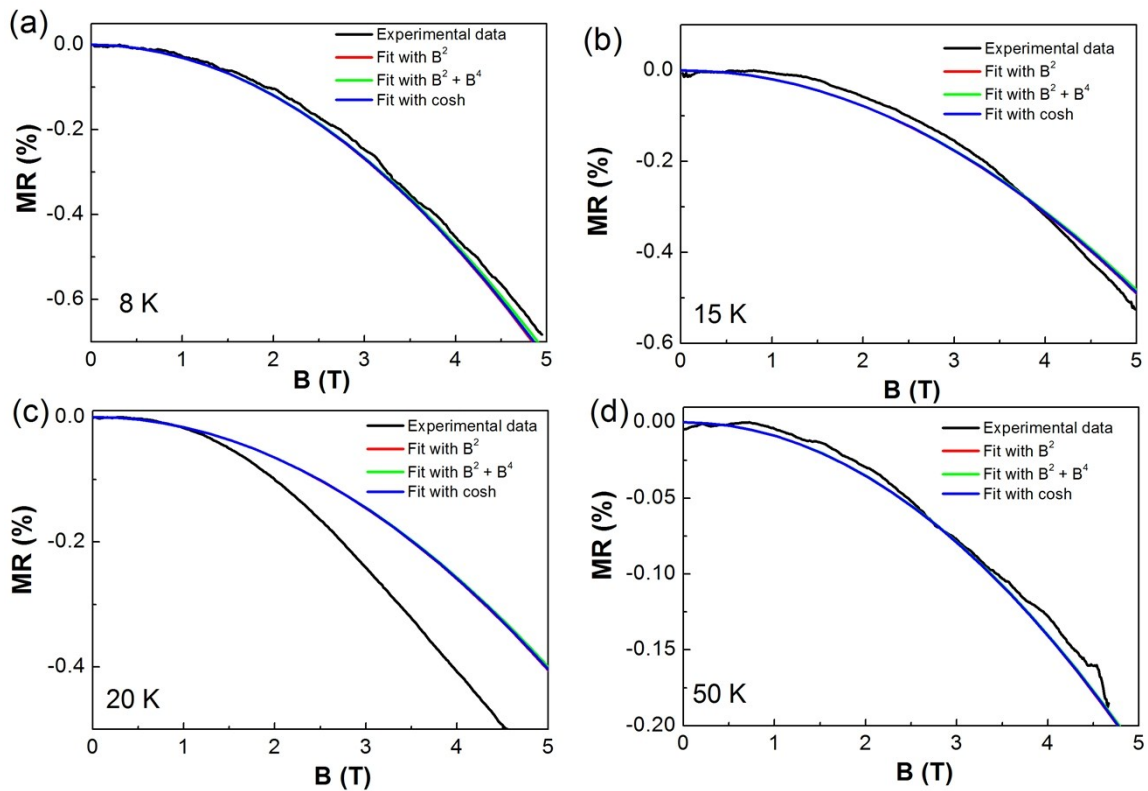

**Figure S7** Temperature dependent MR curves fitted considering only the  $B^2$  term,  $B^2 + B^4$  term, and the full *cosh* function.

### Magnetic crystalline anisotropy energy calculation

The magnetic crystalline anisotropy energy (MAE) is the energy difference of the system when the magnetization is along different directions due to spin-orbit coupling (SOC). The magnetization direction with lower energy is easier to achieve, and hence determines the easy axis, while the direction with higher energy determines the hard axis. Therefore, the MAE can be estimated from the difference between the energies required when applying the magnetic field along different directions to achieve magnetization saturation, starting from a demagnetized state. From the measured normalized hysteresis loop (**Figure 3d**), we can calculate the energy difference of each unit cell by calculating the magnetic energy  $\int M dB$ . It is known that the out of plane magnetisation curve contains a strong demagnetisation energy term and magnetic domains are formed to reduce the demagnetisation energy. Considering the films are uniformly magnetized. The demagnetization field,  $4\pi M_s$  will occur in the out-of-plane direction and the effective field along the out-of-plane direction should be  $H-4\pi M_s$ . Adopting the saturated magnetic moment  $M_s$  to be about  $0.5 \mu_B$  obtained from the *ab initio* results, and the unit cell volume of  $VS_2$  is  $17.24 \text{ \AA}^3 = 1.724 \times 10^{-23} \text{ cm}^3$ . Therefore the demagnetization field is equal to 0.33T. After subtracting the contribution of the demagnetization field, we found out the MAE to be about  $16.3 \mu eV$ , which is also very close to the value of  $19 \mu eV$  predicted from *ab initio* results. Therefore, both theory and experiments consistently indicate that  $VS_2$  is a magnetic material.

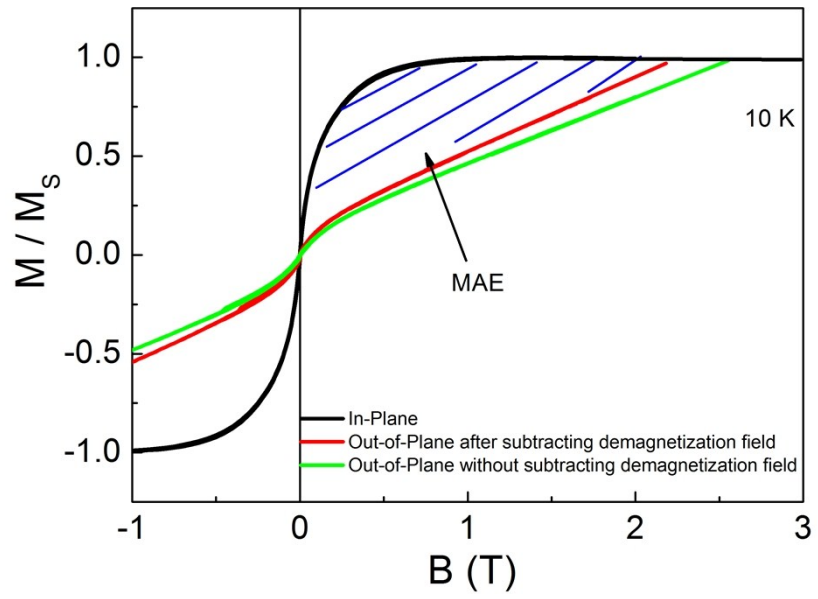

**Figure S8.** Schematic drawing of MAE calculation.

## Anomalous Hall effect of VS<sub>2</sub>

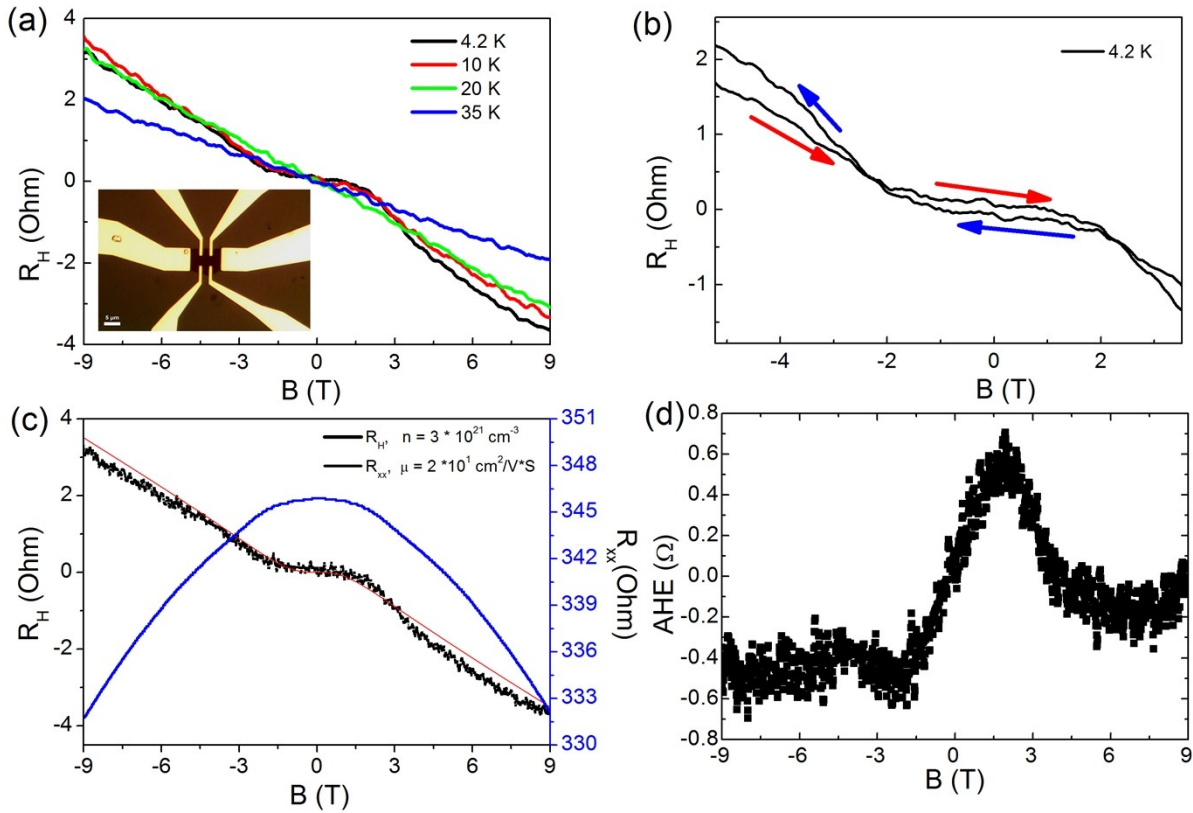

**Figure S9.** (a) Temperature dependent AHE of VS<sub>2</sub> flake. (b) AHE measured at 4.2 K. (c) MR and AHE measured at 4.2K, where AHE is fitted with the two-channel conduction model. (d) AHE after subtracting the linear component due to the conventional Hall effect.

**Figure S9a** and **S9b** show temperature dependent AHE of a VS<sub>2</sub> flake. The field cycle directions are indicated in **Figure S9b**. One can see that the measured Hall resistance is close to but not zero. There are two main contributions to the measured curve (the conventional Hall effect and anomalous Hall effect), in which the conventional Hall effect contributes to the linear portion at high field. The anomalous Hall effect mainly describes the nonlinear term of the Hall signal, which is usually related to the out-of-plane magnetic moment of the measured sample. To demonstrate that the measured nonlinear curve is not due contributions from multiple bands. We fitted the  $R_H$  curve with the two-channel conduction model (**Figure S9c**). However, we could not well reproduce

produce a matching fitting for the data even under the best result (see the red curve above), where these parameters:  $n_1 = -2.7 \times 10^{22} \text{ cm}^{-3}$ ,  $\mu_1 = 0.023 \text{ cm}^2/\text{VS}$ ,  $n_2 = 0.015 \times 10^{21} \text{ cm}^{-3}$ ,  $\mu_2 = 3926 \text{ cm}^2/\text{VS}$ , still indicate the major conductance contribution comes from channel 2 (> 99%). In contrast, using the slope of the high-field  $R_H$  and only considering one type of carrier (hole), we obtain the values,  $n = 3 \times 10^{21} \text{ cm}^{-3}$ ,  $\mu = 20 \text{ cm}^2/\text{VS}$ , which are more reasonable. Therefore, we believe that the nonlinear Hall resistance is due to the anomalous Hall effect. After subtracting the linear background, we obtain a signal proportional to the magnetic moments in the crystal (**Figure S9d**). The saturation field around 2.6 T is consistent with the  $M(H)$  curve we measured, which further reflects the switching of magnetic structure in the crystal.

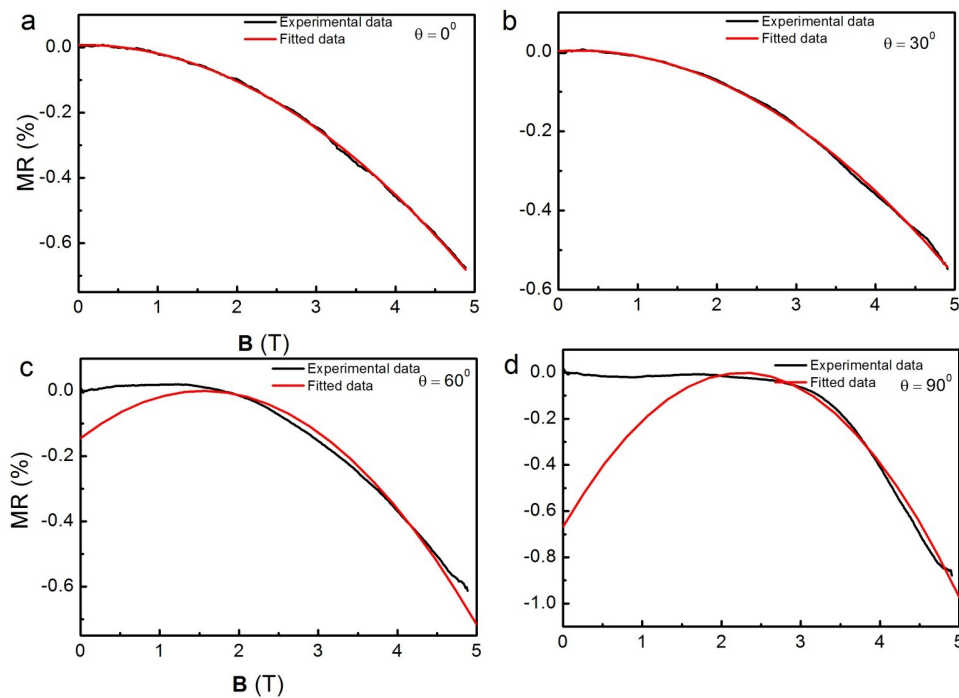

**Figure S10** The angular threshold for quadratic dependence of external field of H for NMR of  $\text{VS}_2$ . The quadratic  $B$  dependence of MR starts from threshold field  $B_c$ . Before  $B_c$ , MR is considered to be constant at zero. Different values of the angle  $\theta$  of magnetic field with respect to the in-plane result in different threshold fields  $B_c$ . The threshold field (a)  $B_c = 0$ , (b)  $B_c = 0.5667$  T, (c)  $B_c = 1.7$  T, and (d)  $B_c = 2.2667$  T.



| Lattice Constants used in calculations             | [001] (eV) | Magnetic moment ( $\mu_B$ ) | [100](eV)  | Magnetic moment ( $\mu_B$ ) | $\Delta E(\mu eV)=[001]-[100]$ |
|----------------------------------------------------|------------|-----------------------------|------------|-----------------------------|--------------------------------|
| Lattice constant and ion positions from Experiment | -20.307726 | 0.5562                      | -20.307745 | 0.5563                      | 19                             |
| only ion positions optimization                    | -20.307958 | 0.5558                      | -20.307982 | 0.5561                      | 24                             |
| Lattice constants and ion positions optimization   | -20.319442 | 0.4692                      | -20.319456 | 0.4693                      | 14                             |

**Table S1.** Calculated magnetic anisotropy energies and magnetic moments for three different optimization methods: fixed lattice constants and ion positions from reported experiments, only ion positions relaxed and fixed lattice constants, and lattice constants and ion positions all relaxed.

## Supplementary references

1. Yuan, J. *et al.* Facile Synthesis of Single Crystal Vanadium Disulfide Nanosheets by Chemical Vapor Deposition for Efficient Hydrogen Evolution Reaction. *Adv. Mater.* **27**, 5605-5609 (2015).
2. Ji, Q. *et al.* Metallic Vanadium Disulfide Nanosheets as a Platform Material for Multifunctional Electrode Applications. *Nano Letters* **17**, 4908-4916, doi:10.1021/acs.nanolett.7b01914 (2017).
3. Zhang, H., Liu, L.-M. & Lau, W.-M. Dimension-dependent phase transition and magnetic properties of VS<sub>2</sub>. *J. Mater. Chem. A* **1**, 10821-10828 (2013).
4. Yang, C. *et al.* VS<sub>2</sub>/graphite hybrid nanosheets as a high rate-capacity and stable anode material for sodium-ion batteries. *Energy Environ Sci.* **10**, 107-113, doi:10.1039/C6EE03173K (2017).
